# Supplementary material for: Synthesis of novel nitrogen-doped lithium titanate with ultra-high rate capability using melamine as a solid nitrogen source
Source: Royal Society of Chemistry journal article supplement (doi:10.1039/c5ta01179e), 2015-01-01
Supplement: c5ta01179e1.pdf [file c5ta01179e1.pdf]

Supporting Information

## Synthesis of Novel Nitrogen-Doped Lithium Titanate with Ultra-High Rate Capability Using Melamine as A Solid Nitrogen Source

Min Guo<sup>a</sup>, Suqing Wang<sup>a\*</sup>, Liang-Xin Ding<sup>a</sup>, Long Zheng<sup>a</sup>, Haihui Wang<sup>a,b\*</sup>

<sup>a</sup> School of Chemistry & Chemical Engineering, South China University of Technology, Wushan Road, Guangzhou 510640, China

<sup>b</sup> School of Chemical Engineering, The University of Adelaide, Adelaide, SA 5005, Australia

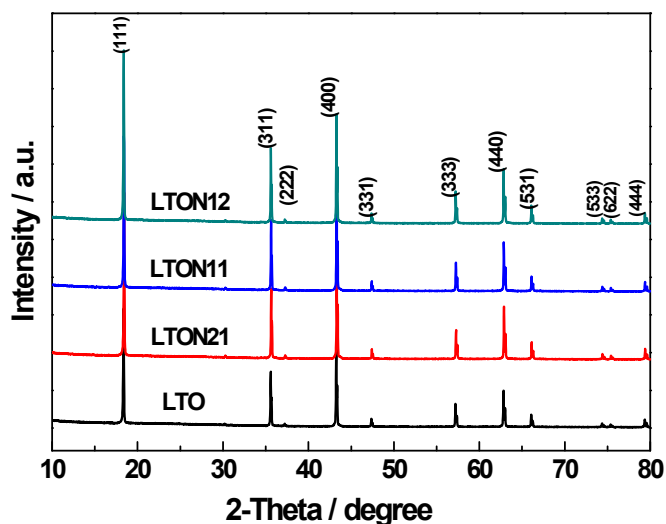

Figure S1. XRD of the pristine LTO and the N-doped LTO samples.

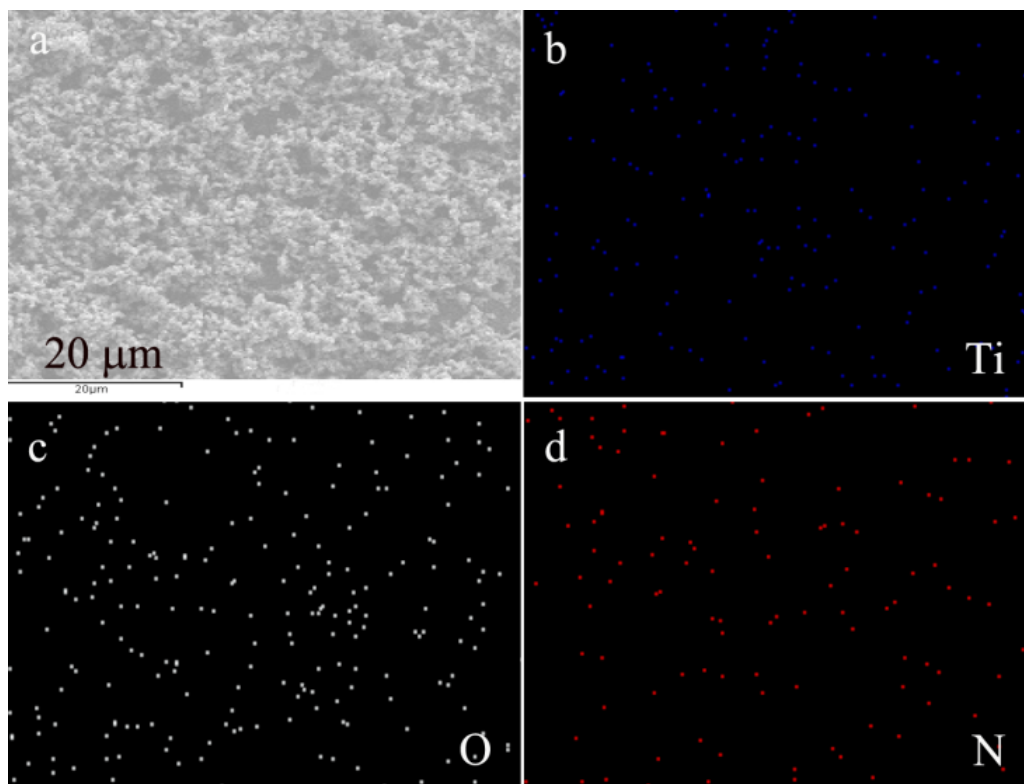

Figure S2. (a) SEM image of LTON12; EDX element distribution mapping of (b) Ti, (c) O, (d) N elements for LTON12 sample.

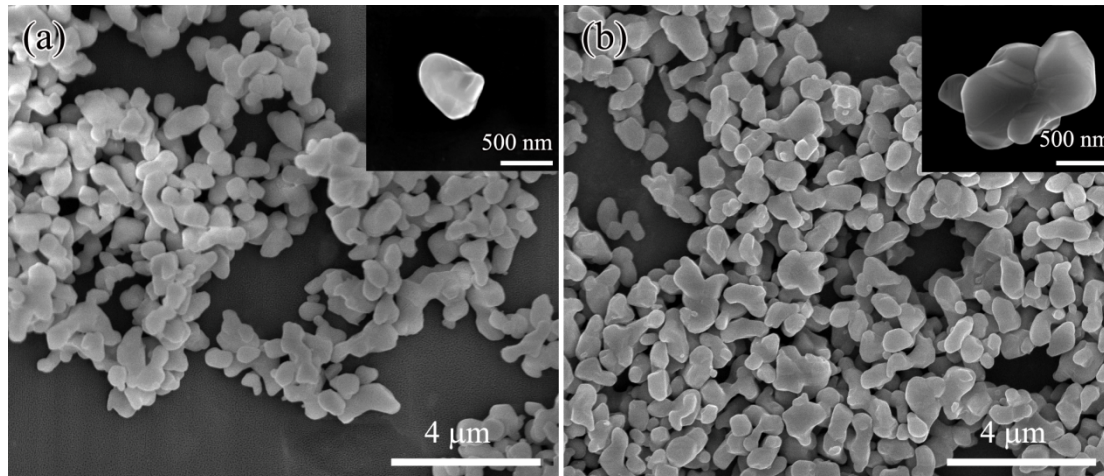

Figure S3. SEM images of the as-prepared samples: (a) LTON21, (b) LTON11.

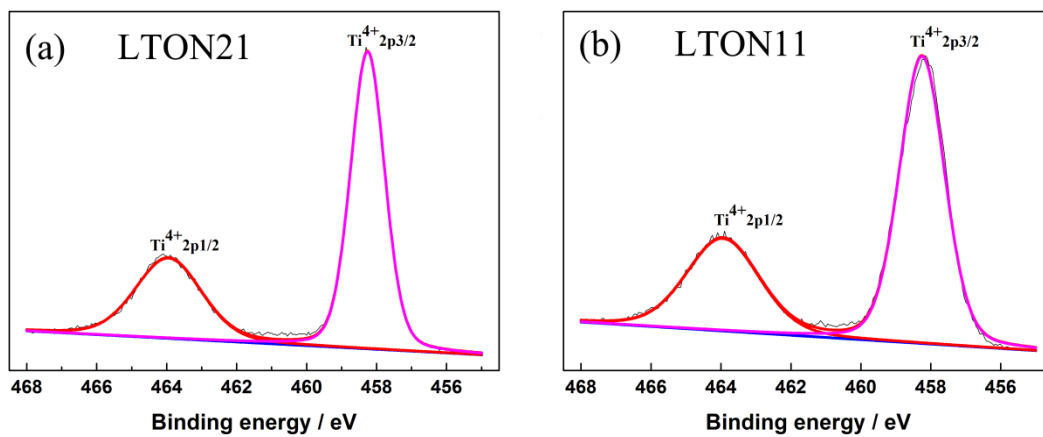

Figure S4. XPS of (a) LTON21 and (b) LTON11.

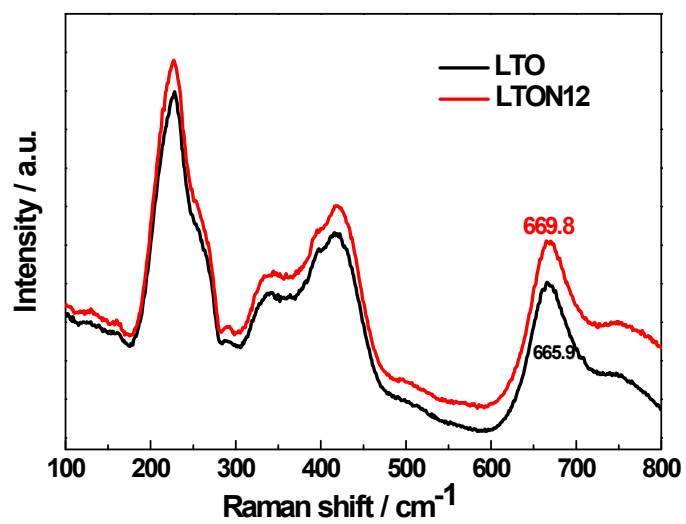

Figure S5. Raman spectra of LTO and LTON12 powders.

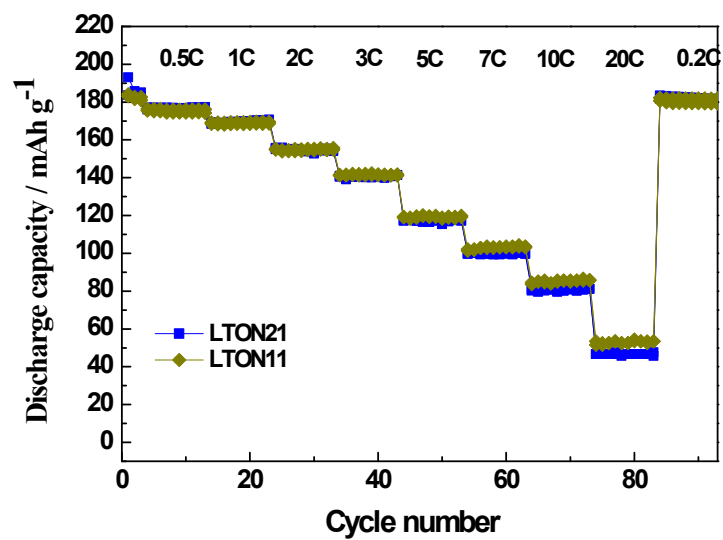

Figure S6. Rate capabilities of the N-doped LTO samples (LTON21 and LTON11) under various current densities ranging from 0.2C to 20C.

Table S1. The quantification results of EDX elemental mapping.

| <b>Element</b> | <b>Weight %</b> | <b>Atomic %</b> | <b>Uncert. %</b> | <b>Correction</b> | <b>k-Factor</b> |
|----------------|-----------------|-----------------|------------------|-------------------|-----------------|
| N(K)           | 8.40            | 14.67           | 1.15             | 0.28              | 3.466           |
| O(K)           | 38.70           | 59.17           | 1.55             | 0.51              | 1.889           |
| Ti(K)          | 45.92           | 23.45           | 1.20             | 0.98              | 1.227           |
| Cu(K)          | 6.96            | 2.68            | 0.58             | 0.99              | 1.663           |
